# Supplementary material for: Anti-malaria drug chloroquine is highly effective in treating avian influenza A H5N1 virus infection in an animal model
Source: Springer Nature journal article supplement (doi:10.1038/cr.2012.165), 2012-12-04
Supplement: 41422_2013_BFcr2012165_MOESM26_ESM.pdf [file 41422_2013_BFcr2012165_MOESM26_ESM.pdf]

**A**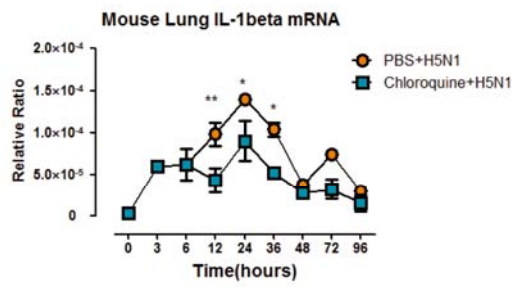**B**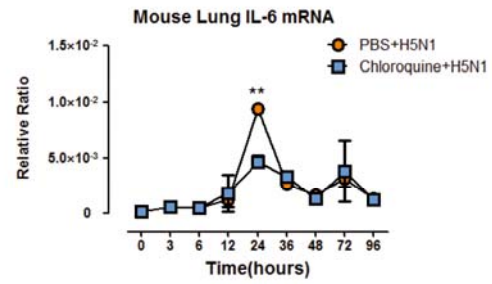**C**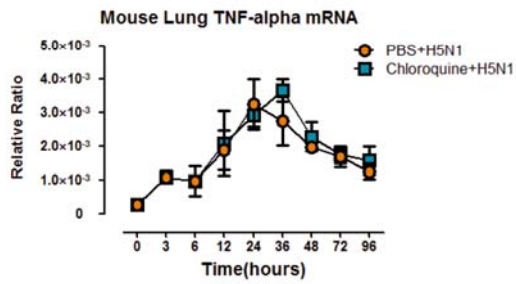

**Supplementary information, Figure S1 (A, B, C)** Real time quantitativePCR analysis of IL-1  $\beta$ 's, IL-6's and TNF- $\alpha$ 's relative ratio to beta-actin in mice lung tissue receiving therapeutic treatment of CQ as described above. (n=3 mice per group).
